# Supplementary material
Source: publisher figshare collection journal article supplement (https://gsajournals.figshare.com/ndownloader/files/17930537)
Supplement: Supplementary file 1 [file 17930537]

| **Table S8** Summary of RNA-Seq datasets. Total reads are the number of reads that have passed quality filtering for each sample. Aligned reads and percent aligned are the number and percent of total reads that could be aligned to the reference genome. Uniquely mapped and percentage mapped reads are the number and percentage of reads that mapped uniquely. | | | | | | | | | | |
| --- | --- | --- | --- | --- | --- | --- | --- | --- | --- | --- |
| **Sample Number** | **Selected Odor** | **Treatment** | **Line** | **Replicate** | **Total Reads** | **Aligned Reads** | **% Aligned** | **Uniquely Mapped Reads** | **% Uniquely Mapped** |
| 1 | BUT | PI+ | 1 | A | 33852968 | 32321759 | 95.48% | 31220497 | 96.59% |
| 2 | BUT | PI+ | 1 | B | 33118896 | 31626972 | 95.50% | 30878885 | 97.63% |
| 3 | BUT | PI+ | 2 | A | 33492528 | 32008352 | 95.57% | 30284443 | 94.61% |
| 4 | BUT | PI+ | 2 | B | 33487041 | 31974019 | 95.48% | 30963281 | 96.84% |
| 5 | BUT | PI+ | 3 | A | 37304675 | 35666998 | 95.61% | 34931659 | 97.94% |
| 6 | BUT | PI+ | 3 | B | 34796578 | 33242677 | 95.53% | 32561520 | 97.95% |
| 7 | BUT | PI- | 1 | A | 38651620 | 36924436 | 95.53% | 36160902 | 97.93% |
| 8 | BUT | PI- | 1 | B | 31649222 | 30221313 | 95.49% | 29586726 | 97.90% |
| 9 | BUT | PI- | 2 | A | 32482103 | 31015199 | 95.48% | 29995229 | 96.71% |
| 10 | BUT | PI- | 2 | B | 40658956 | 38863858 | 95.58% | 37755385 | 97.15% |
| 11 | BUT | PI- | 3 | A | 44347345 | 42589106 | 96.04% | 41613544 | 97.71% |
| 12 | BUT | PI- | 3 | B | 40692821 | 39065733 | 96.00% | 38191933 | 97.76% |
| 13 | CYC | PI+ | 1 | A | 29699874 | 28509568 | 95.99% | 26616584 | 93.36% |
| 14 | CYC | PI+ | 1 | B | 43499156 | 41765955 | 96.02% | 40783938 | 97.65% |
| 15 | CYC | PI+ | 2 | A | 30181997 | 28942999 | 95.89% | 26986299 | 93.24% |
| 16 | CYC | PI+ | 2 | B | 36415768 | 34950369 | 95.98% | 34166593 | 97.76% |
| 17 | CYC | PI+ | 3 | A | 31379131 | 30114087 | 95.97% | 28546835 | 94.80% |
| 18 | CYC | PI+ | 3 | B | 42529693 | 40830459 | 96.00% | 39890603 | 97.70% |
| 19 | CYC | PI- | 1 | A | 28102160 | 26921754 | 95.80% | 25786816 | 95.78% |
| 20 | CYC | PI- | 1 | B | 40361269 | 38714470 | 95.92% | 37716241 | 97.42% |
| 21 | CYC | PI- | 2 | A | 45232932 | 43323381 | 95.78% | 41888016 | 96.69% |
| 22 | CYC | PI- | 2 | B | 41210786 | 39457060 | 95.74% | 38590482 | 97.80% |
| 23 | CYC | PI- | 3 | A | 35036617 | 33529544 | 95.70% | 32525267 | 97.00% |
| 24 | CYC | PI- | 3 | B | 42540205 | 40729236 | 95.74% | 39787622 | 97.69% |
| 25 | Control | Control | 1 | A | 32739127 | 31321704 | 95.67% | 29821690 | 95.21% |
| 26 | Control | Control | 1 | B | 35278931 | 33769721 | 95.72% | 32293653 | 95.63% |
| 27 | Control | Control | 2 | A | 24625132 | 23563644 | 95.69% | 23048691 | 97.81% |
| 28 | Control | Control | 2 | B | 43942255 | 42072205 | 95.74% | 41237656 | 98.02% |
| 29 | Control | Control | 3 | A | 38098017 | 36431985 | 95.63% | 35311083 | 96.92% |
| 30 | Control | Control | 3 | B | 30250586 | 28907501 | 95.56% | 27836687 | 96.30% |
